# Supplementary material for: Hierarchical Principal Components for Data-Driven Multiresolution fMRI Analyses
Source: Brain Sci. 2024 Mar 28;14(4):325. doi: 10.3390/brainsci14040325 (PMC11048444; doi:10.3390/brainsci14040325)
Supplement: Supplementary file 1 [file brainsci-14-00325-s001.zip]

Archive with 6 entries (6 files):
- Figure S1.png
- Figure S2.tiff
- Figure S3.tiff
- Figure S4.tiff
- Figure S5.tiff
- Supplementary Figure Legends.pdf
